# Supplementary material for: An ECHO of Cartilage: In Silico Prediction of Combinatorial Treatments to Switch Between Transient and Permanent Cartilage Phenotypes With Ex Vivo Validation
Source: Front Bioeng Biotechnol. 2021 Nov 15;9:732917. doi: 10.3389/fbioe.2021.732917 (PMC8634894; doi:10.3389/fbioe.2021.732917)
Supplement: Supplementary file 4 [file Table2.XLS]

## Sheet: Sheet1
Interaction	k	Scenario
Akt --> NFkb	0.6666	1
Akt --> Runx2 PTM	1	1
Akt --| Akt	1	1
Akt prom --> Akt prot	0.1	1
Akt prom --| Akt prom	1	1
Akt prot --| Akt prot	0.1	1
Akt prot AND Akt PTM --> Akt	1	3
Akt PTM --> Akt	0	1
Akt PTM --| Akt PTM	1	1
ATF2 --> CCND1 prom	0.6666	1
ATF2 --| ATF2	1	1
ATF2 prom --> ATF2 prot	0.1	1
ATF2 prom --| ATF2 prom	1	1
ATF2 prot --| ATF2 prot	0.1	1
ATF2 prot AND ATF2 PTM --> ATF2	1	3
ATF2 PTM --> ATF2	0	1
ATF2 PTM --| ATF2 PTM	1	1
ATF4 --> Ihh prom	0.6666	1
ATF4 --| ATF4	1	1
B-catenin --> FGF prom	0.6666	1
B-catenin --> Lef/Tcf prom	0.4444	1
B-catenin --> Lef/Tcf PTM	1	1
B-catenin --| B-catenin	1	1
B-catenin --| Sox9 PTM	1	1
B-catenin AND Lef/Tcf --> Bcatleftcfcomplex	1	3
Bcat dummy value must be 1 --> B-catenin	1	1
Bcatleftcfcomplex --> Wnt prom	0.6666	1
Bcatleftcfcomplex --| Bcatleftcfcomplex	1	1
BMP --> p38	0.6666	1
BMP --> R-smad	1	1
BMP --> Ras	0.4444	1
BMP --| BMP	0.1	1
BMP prom --> BMP	0.1	1
BMP prom --| BMP prom	1	1
C/EBPb dummy --| C/EBPb dummy	1	1
C/EBPb dummy AND p38 --> MMP13 prom	0.25	3
CCND1 --| CCND1	1	1
CCND1 --| Runx2 PTM	1	1
CCND1 --| Smad3	0.3333	1
CCND1 dummy must be 1 --> CCND1 PTM	1	1
CCND1 prom --> CCND1 prot	0.1	1
CCND1 prom --| CCND1 prom	1	1
CCND1 prot --| CCND1 prot	0.1	1
CCND1 prot AND CCND1 PTM --> CCND1	1	3
CCND1 PTM --> CCND1	0	1
CCND1 PTM --| CCND1 PTM	1	1
Col-II --| Col-II	0.1	1
Col-II prom --> Col-II	0.1	1
Col-II prom --| Col-II prom	1	1
Col-X --| Col-X	0.1	1
Col-X prom --> Col-X	0.1	1
Col-X prom --| Col-X prom	1	1
DC canonical dummy --| DC canonical dummy	1	1
DC canonical dummy AND DC degradation dummy --> destruction complex	1	3
DC degradation dummy --> destruction complex	0	1
DC degradation dummy --| DC degradation dummy	1	1
DC dummy must be 1 --> DC canonical dummy	1	1
DC dummy must be 1 --> DC degradation dummy	1.5	1
dEF-1 --| dEF-1	0.1	1
dEF-1 --| Ihh prom	0.6666	1
dEF-1 prom --> dEF-1	0.1	1
dEF-1 prom --| dEF-1 prom	1	1
destruction complex --| B-catenin	1	1
destruction complex --| destruction complex	1	1
Dlx5 --> Runx2 prom	0.4444	1
Dlx5 --> Runx2 PTM	1	1
Dlx5 --| Dlx5	1	1
Dlx5 --| Msx2 prom	1	1
Dlx5 --| Msx2 PTM	1	1
Dlx5 prom --> Dlx5 prot	0.1	1
Dlx5 prom --| Dlx5 prom	1	1
Dlx5 prot --| Dlx5 prot	0.1	1
Dlx5 prot AND Dlx5 PTM --> Dlx5	1	3
Dlx5 PTM --> Dlx5	0	1
Dlx5 PTM --| Dlx5 PTM	1	1
Dsh --| DC canonical dummy	1	1
Dsh --| Dsh	1	1
ERK1/2 --> ATF4	0.6666	1
ERK1/2 --> Ets1 PTM	0.6666	1
ERK1/2 --> Runx2 PTM	1	1
ERK1/2 --| DC degradation dummy	1	1
ERK1/2 --| ERK1/2	1	1
ERK1/2 --| GSK	0	1
ERK1/2 --| Smad3	0.3333	1
ERK1/2 --| Smadcomplex	1	1
Ets1 --> dEF-1 prom	0.6666	1
Ets1 --| Ets1	1	1
Ets1 prom --> Ets1 prot	0.1	1
Ets1 prom --| Ets1 prom	1	1
Ets1 prot --| Ets1 prot	0.1	1
Ets1 prot AND Ets1 PTM --> Ets1	1	3
Ets1 PTM --> Ets1	0	1
Ets1 PTM --| Ets1 PTM	1	1
FGF --> FGFR1 PTM	1	1
FGF --> FGFR3 PTM	1	1
FGF --| FGF	0.1	1
FGF prom --> FGF	0.1	1
FGF prom --| FGF prom	1	1
FGFR1 --> NFkb	0.6666	1
FGFR1 --> Ras	0.4444	1
FGFR1 --> STAT1 PTM	0.4444	1
FGFR1 --| FGFR1	1	1
FGFR1 prom --> FGFR1 prot	0.1	1
FGFR1 prom --| FGFR1 prom	1	1
FGFR1 prot --| FGFR1 prot	0.1	1
FGFR1 prot AND FGFR1 PTM --> FGFR1	1	3
FGFR1 PTM --> FGFR1	0	1
FGFR1 PTM --| FGFR1 PTM	1	1
FGFR3 --> Ras	0.4444	1
FGFR3 --> STAT1 PTM	0.4444	1
FGFR3 --| FGFR3	1	1
FGFR3 prom --> FGFR3 prot	0.1	1
FGFR3 prom --| FGFR3 prom	1	1
FGFR3 prot --| FGFR3 prot	0.1	1
FGFR3 prot AND FGFR3 PTM --> FGFR3	1	3
FGFR3 PTM --> FGFR3	0	1
FGFR3 PTM --| FGFR3 PTM	1	1
Frizzled - LRP 5/6 --> Dsh	1	1
Gli2 --> BMP prom	0.6666	1
Gli2 --> CCND1 prom	0.4444	1
Gli2 --> PPR prom	0.6666	1
Gli2 --> TGFb prom	1	1
Gli2 --> Wnt prom	1.3332	1
Gli2 --| Gli2	1	1
Gli2 --| MMP13 prom	0.25	1
Gli2 AND Sox9 --> PTHrP prom	0.3333	3
GSK --> Ets1 PTM	0.6666	1
GSK --| CCND1 PTM	0.25	1
GSK --| GSK	1	1
GSK --| HDAC4	1	1
GSK dummy --| GSK dummy	1	1
GSK dummy AND ERK1/2 --| GSK	1	3
GSK dummy must be one --> GSK	1	1
HDAC4 --| HDAC4	1	1
HDAC4 --| MEF2C PTM	1	1
HDAC4 --| Runx2 PTM	0	1
HIF-2a --> MMP13 prom	0.25	1
HIF-2a --> Runx2 prom	0.4444	1
HIF-2a --| HIF-2a	0.1	1
HIF-2a AND Runx2 --> C/EBPb dummy	1	3
HIF-2a prom --> HIF-2a	0.1	1
HIF-2a prom --| HIF-2a prom	1	1
IGF-1 --> IGF-1R PTM	1	1
IGF-1 --> PKA	0.6666	1
IGF-1 --| IGF-1	0.1	1
IGF-1 prom --> IGF-1	0.1	1
IGF-1 prom --| IGF-1 prom	1	1
IGF-1R --> PI3K PTM	0.6666	1
IGF-1R --> STAT1 PTM	0.3333	1
IGF-1R --| IGF-1R	1	1
IGF-1R prom --> IGF-1R prot	0.1	1
IGF-1R prom --| IGF-1R prom	1	1
IGF-1R prot --| IGF-1R prot	0.1	1
IGF-1R prot AND IGF-1R PTM --> IGF-1R	1	3
IGF-1R PTM --> IGF-1R	0	1
IGF-1R PTM --| IGF-1R PTM	1	1
Ihh --> Gli2	0.6666	1
Ihh --| Ihh	0.1	1
Ihh prom --> Ihh	0.1	1
Ihh prom --| Ihh prom	1	1
Lef/Tcf --> Bcatleftcfcomplex	0	1
Lef/Tcf --> Runx2 prom	0.4444	1
Lef/Tcf --| Lef/Tcf	1	1
Lef/Tcf dummy must be 1 --> Lef/Tcf prom	0.4444	1
Lef/Tcf prom --> Lef/Tcf prot	0.1	1
Lef/Tcf prom --| Lef/Tcf prom	1	1
Lef/Tcf prot --| Lef/Tcf prot	0.1	1
Lef/Tcf prot AND Lef/Tcf PTM --> Lef/Tcf	1	3
Lef/Tcf PTM --> Lef/Tcf	0	1
Lef/Tcf PTM --| Lef/Tcf PTM	1	1
MEF2C --> Col-X prom	0.6666	1
MEF2C --> Dlx5 prom	1	1
MEF2C --> Runx2 prom	0.4444	1
MEF2C --| MEF2C	1	1
MEF2C prom --> MEF2C prot	0.1	1
MEF2C prom --| MEF2C prom	1	1
MEF2C prot --| MEF2C prot	0.1	1
MEF2C prot AND MEF2C PTM --> MEF2C	1	3
MEF2C PTM --> MEF2C	0	1
MEF2C PTM --| MEF2C PTM	1	1
MMP13 --| MMP13	0.1	1
MMP13 prom --> MMP13	0.1	1
MMP13 prom --| MMP13 prom	1	1
Msx2 --| Dlx5 prom	1	1
Msx2 --| Dlx5 PTM	1	1
Msx2 --| Msx2	1	1
Msx2 --| Runx2 prom	0.4444	1
Msx2 --| Runx2 PTM	1	1
Msx2 --| Wnt prom	0.6666	1
Msx2 dummy must be 1 --> Msx2 PTM	1	1
Msx2 prom --> Msx2 prot	0.1	1
Msx2 prom --| Msx2 prom	1	1
Msx2 prot --| Msx2 prot	0.1	1
Msx2 prot AND Msx2 PTM --> Msx2	1	3
Msx2 PTM --> Msx2	0	1
Msx2 PTM --| Msx2 PTM	1	1
NFkb --> BMP prom	0.6666	1
NFkb --> Col-II prom	0.4444	1
NFkb --> dEF-1 prom	0.6666	1
NFkb --> HIF-2a prom	1	1
NFkb --> IGF-1R prom	1	1
NFkb --> Ihh prom	0.6666	1
NFkb --> MMP13 prom	0.25	1
NFkb --> Smad7 prom	0.533	1
NFkb --| NFkb	1	1
Nkx3.2 --> Col-II prom	0.4444	1
Nkx3.2 --> Sox9 prom	0.3333	1
Nkx3.2 --| Nkx3.2	0.1	1
Nkx3.2 --| Runx2 prom	0	1
Nkx3.2 prom --> Nkx3.2	0.1	1
Nkx3.2 prom --| Nkx3.2 prom	1	1
p38 --> Dlx5 PTM	1	1
p38 --> MEF2C PTM	1	1
p38 --> MMP13 prom	0	1
p38 --> Sox9 prom	0.3333	1
p38 --| p38	1	1
p38 AND Smad3 --> ATF2 PTM	1	3
PI3K --> Akt PTM	1	1
PI3K --| PI3K	1	1
PI3K prom --> PI3K prot	0.1	1
PI3K prom --| PI3K prom	1	1
PI3K prot --| PI3K prot	0.1	1
PI3K prot AND PI3K PTM --> PI3K	1	3
PI3K PTM --> PI3K	0	1
PI3K PTM --| PI3K PTM	1	1
PKA --> ATF4	0.6666	1
PKA --> CCND1 prom	0.6666	1
PKA --> GSK dummy	1	1
PKA --> IGF-1 prom	1	1
PKA --> PP2A	1	1
PKA --> PTHrP prom	0.3333	1
PKA --> Runx2 PTM	1	1
PKA --> Sox9 prom	0.3333	1
PKA --> Sox9 PTM	1	1
PKA --| Col-X prom	0.6666	1
PKA --| PKA	1	1
PP2A --> HDAC4	1	1
PP2A --| Akt PTM	0.5	1
PP2A --| ERK1/2	1	1
PP2A --| GSK dummy	1	1
PP2A --| PP2A	1	1
PPR --> Nkx3.2 prom	0.6666	1
PPR --> PKA	0.6666	1
PPR --| PPR	1	1
PPR prom --> PPR prot	0.1	1
PPR prom --| PPR prom	1	1
PPR prot --| PPR prot	0.1	1
PPR prot AND PPR PTM --> PPR	1	3
PPR PTM --> PPR	0	1
PPR PTM --| PPR PTM	1	1
PTHrP --> PPR PTM	1	1
PTHrP --| PTHrP	0.1	1
PTHrP prom --> PTHrP	0.1	1
PTHrP prom --| PTHrP prom	1	1
R-smad --> Col-X prom	0.6666	1
R-smad --> Smadcomplex	1	1
R-smad --| Dsh	0.5	1
R-smad --| R-smad	1	1
Ras --> ERK1/2	1	1
Ras --> PI3K PTM	0.6666	1
Ras --| Ras	1	1
Runx2 --> Akt prom	1	1
Runx2 --> C/EBPb dummy	0	1
Runx2 --> Col-X prom	0.6666	1
Runx2 --> FGF prom	0.6666	1
Runx2 --> FGFR1 prom	1	1
Runx2 --> Ihh prom	0.6666	1
Runx2 --> Lef/Tcf prom	0.4444	1
Runx2 --> MEF2C prom	0.6666	1
Runx2 --> MMP13 prom	0.25	1
Runx2 --> PI3K prom	1	1
Runx2 --> Runx2 prom	0.4444	1
Runx2 --| Runx2	1	1
Runx2 --| Sox9 PTM	1	1
Runx2 prom --> Runx2 prot	0.1	1
Runx2 prom --| Runx2 prom	1	1
Runx2 prot --| Runx2 prot	0.1	1
Runx2 prot AND Runx2 PTM --> Runx2	1	3
Runx2 PTM --> Runx2	0	1
Runx2 PTM --| Runx2 PTM	1	1
Smad3 --> ATF2 prom	1	1
Smad3 --> ATF2 PTM	0	1
Smad3 --> Ets1 prom	1	1
Smad3 --> Msx2 prom	1	1
Smad3 --> PTHrP prom	0.3333	1
Smad3 --> Smad7 prom	0.266	1
Smad3 --> Sox9 PTM	1	1
Smad3 --| Dlx5 prom	1	1
Smad3 --| MEF2C PTM	1	1
Smad3 --| Smad3	1	1
Smad3 AND HDAC4 --| Runx2 PTM	1	3
Smad7 --| R-smad	1	1
Smad7 --| Smad3	0.5	1
Smad7 --| Smad7	0.1	1
Smad7 prom --> Smad7	0.1	1
Smad7 prom --| Smad7 prom	1	1
Smadcomplex --> Dlx5 prom	1	1
Smadcomplex --> Dlx5 PTM	1	1
Smadcomplex --> Ihh prom	0.6666	1
Smadcomplex --> MEF2C prom	0.6666	1
Smadcomplex --> MEF2C PTM	1	1
Smadcomplex --> Msx2 prom	1	1
Smadcomplex --> PPR prom	0.6666	1
Smadcomplex --> Smad7 prom	0.266	1
Smadcomplex --| FGFR1 PTM	0.5	1
Smadcomplex --| Smadcomplex	1	1
Smadcomplex --| STAT1 PTM	1	1
Smadcomplex AND Nkx3.2 --| Runx2 prom	0.4444	3
Sox9 --> Col-II prom	0.4444	1
Sox9 --> FGFR3 prom	1	1
Sox9 --> Nkx3.2 prom	0.6666	1
Sox9 --> PPR prom	0.6666	1
Sox9 --> PTHrP prom	0.3333	1
Sox9 --> Sox9 prom	0.3333	1
Sox9 --| Lef/Tcf PTM	1	1
Sox9 --| Runx2 PTM	1	1
Sox9 --| Sox9	1	1
Sox9 prom --> Sox9 prot	0.1	1
Sox9 prom --| Sox9 prom	1	1
Sox9 prot --| Sox9 prot	0.1	1
Sox9 prot AND Sox9 PTM --> Sox9	1	3
Sox9 PTM --> Sox9	0	1
Sox9 PTM --| Sox9 PTM	1	1
STAT1 --> Smad7 prom	0.266	1
STAT1 --| CCND1 PTM	0.5	1
STAT1 --| IGF-1R prom	1	1
STAT1 --| PPR prom	0.6666	1
STAT1 --| STAT1	1	1
STAT1 prot AND STAT1 PTM --> STAT1	1	3
STAT1 PTM --> STAT1	0	1
STAT1 PTM --| STAT1 PTM	1	1
TGFb --> p38	0.6666	1
TGFb --> Smad3	1	1
TGFb --| TGFb	0.1	1
TGFb prom --> IGF-1R prom	1	1
TGFb prom --> TGFb	0.1	1
TGFb prom --| TGFb prom	1	1
Wnt --> Frizzled - LRP 5/6	1	1
Wnt --> Ras	0.4444	1
Wnt --| Wnt	0.1	1
Wnt prom --> Wnt	0.1	1
Wnt prom --| Wnt prom	1	1
